# Supplementary material for: Probable Maximum Precipitation Estimation Using the Revised Km-Value Method in Hong Kong
Source: Atypon-hosted journal article supplement (doi:10.1061/(asce)he.1943-5584.0001517), 2017-03-29
Supplement: supplemental_data_he.1943-5584.0001517_lin.pdf [file supplemental_data_he.1943-5584.0001517_lin.pdf]

## SUPPLEMENTAL DATA

*ASCE Journal of Hydrologic Engineering*

# Probable Maximum Precipitation Estimation Using the Revised $K_m$ -Value Method in Hong Kong

Ping Lan, Bingzhang Lin, Yehui Zhang, Hong Chen

**DOI:** 10.1061/(ASCE)HE.1943-5584.0001517

© ASCE 2017

[www.ascelibrary.org](http://www.ascelibrary.org)

**Appendix S1. Derivations of the Inequalities**  $N_s \geq \left[ \left( \frac{K_m^2}{\phi_m^2} \right) / \left( \frac{K_m^2}{\phi_m^2} - 1 \right) \right] (\phi_m^2 + 2)$

$$\begin{aligned}
\therefore K_m &= \phi_m \sqrt{\frac{1}{C_1 - C_2 \phi_m^2}}, \quad C_1 = \frac{(n-1)^3}{n^2(n-2)}, \quad C_2 = \frac{n-1}{n(n-2)} \\
\therefore K_m^2 &= \phi_m^2 \left( \frac{1}{\frac{(n-1)^3}{n^2(n-2)} - \frac{n-1}{n(n-2)} \phi_m^2} \right) \\
\Rightarrow \frac{K_m^2}{\phi_m^2} &= \frac{n^2(n-2)}{(n-1)^3 - n(n-1)\phi_m^2} = \frac{n^3 - 2n^2}{n^3 - n^2 + n - 1 - (n^2 - n)(\phi_m^2 + 2)} \cdot \frac{1}{\frac{1}{n^2}} \\
&\Rightarrow \frac{K_m^2}{\phi_m^2} = \frac{n-2}{n-1 + \frac{1}{n} - \frac{1}{n^2} - (1 - \frac{1}{n})(\phi_m^2 + 2)}
\end{aligned} \tag{S1}$$

When  $n$  increasing,  $\frac{1}{n}$  and  $\frac{1}{n^2}$  could be neglected,  $n-2$  and  $n-1$  could be close to  $n$ , i.e. difference between  $n$  and  $n-2$  or  $n-1$  is very small. Therefore, from the equation (B1) the following equation could be derived.

$$\frac{K_m^2}{\phi_m^2} \approx \frac{n}{n - (\phi_m^2 + 2)} \tag{S2}$$

The above equation could be written as

$$\begin{aligned}
\frac{K_m^2}{\phi_m^2} \cdot [n - (\phi_m^2 + 2)] &\approx n \\
\Rightarrow n \cdot \frac{K_m^2}{\phi_m^2} - \frac{K_m^2}{\phi_m^2} (\phi_m^2 + 2) &\approx n \\
\Rightarrow \frac{K_m^2}{\phi_m^2} (\phi_m^2 + 2) &\approx n \cdot \frac{K_m^2}{\phi_m^2} - n = n \left( \frac{K_m^2}{\phi_m^2} - 1 \right) \\
\Rightarrow n &\approx \frac{\frac{K_m^2}{\phi_m^2} (\phi_m^2 + 2)}{\left( \frac{K_m^2}{\phi_m^2} - 1 \right)} = \left[ \left( \frac{K_m^2}{\phi_m^2} \right) / \left( \frac{K_m^2}{\phi_m^2} - 1 \right) \right] (\phi_m^2 + 2)
\end{aligned}$$

Hence,  $N_s \geq n$ , i.e.,

$$N_s \geq \left[ \left( \frac{K_m^2}{\phi_m^2} \right) / \left( \frac{K_m^2}{\phi_m^2} - 1 \right) \right] (\phi_m^2 + 2)$$
